# Supplementary material
Source: Springer Nature journal article supplement (https://www.springermedizin.de/resource/supplementary/13098_2014_326_MOESM1_ESM.pdf/9671098)

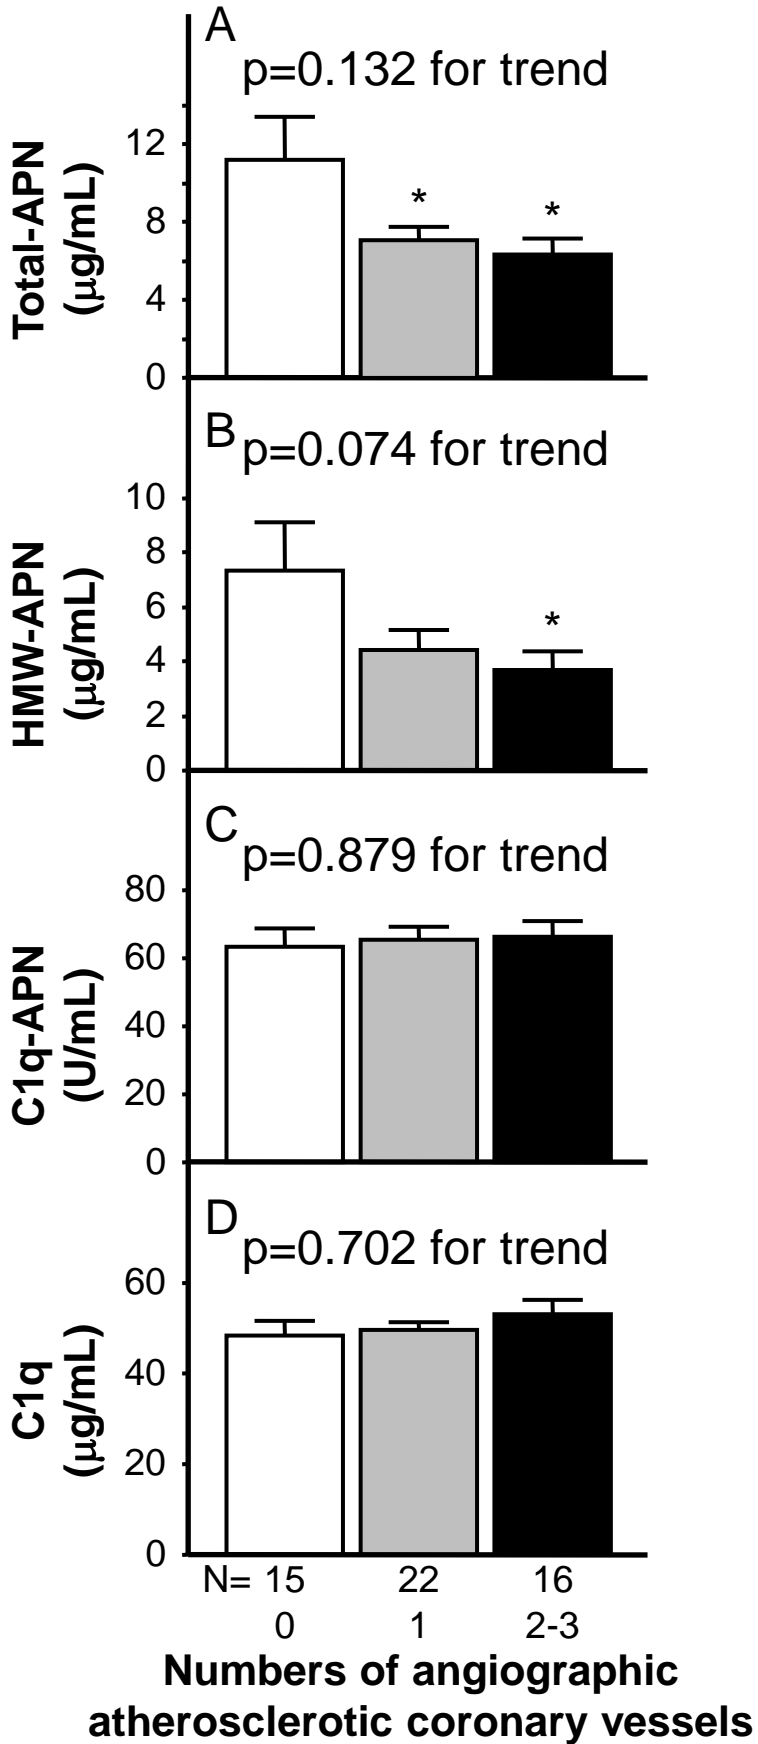

Supplement: MOESM1 [file 9671098]
